# Supplementary material for: Design, Synthesis, and Biological Evaluation of Novel Nitrogen Heterocycle-Containing Ursolic Acid Analogs as Antitumor Agents
Source: PubMed Central journal article supplement (PMC6429512; doi:10.3390/molecules24050877), 2019-03-01
Supplement: molecules-24-00877-s001.pdf [file molecules-24-00877-s001.pdf]

# Supplementary data

$^1\text{H}$  NMR,  $^{13}\text{C}$ NMR and HRMS spectra of compounds

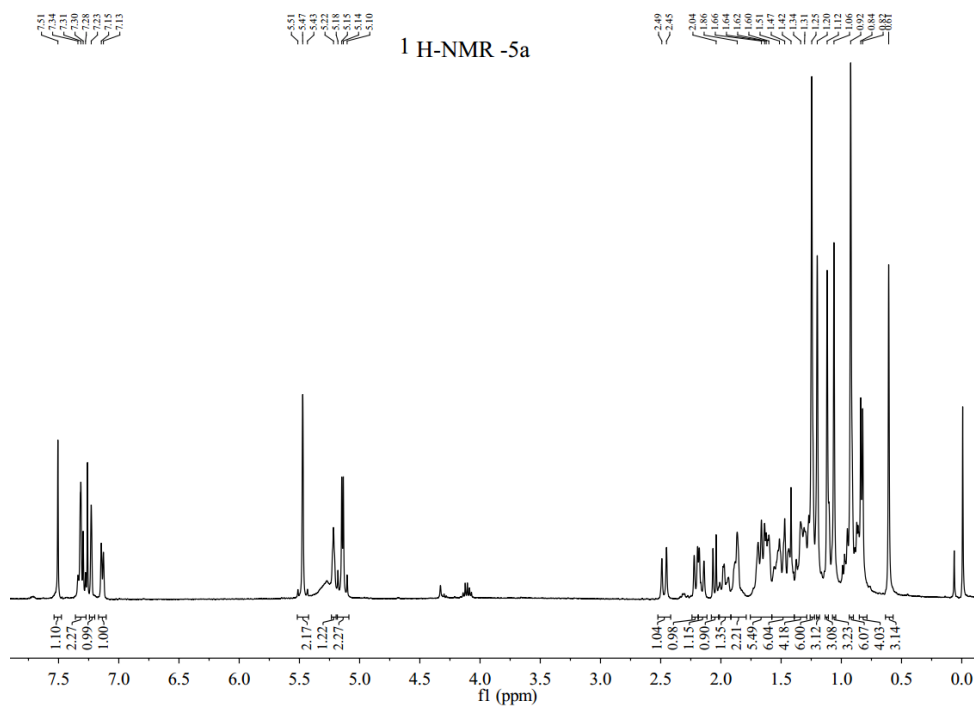

Figure 1.  $^1\text{H}$  NMR spectra of **5a**.

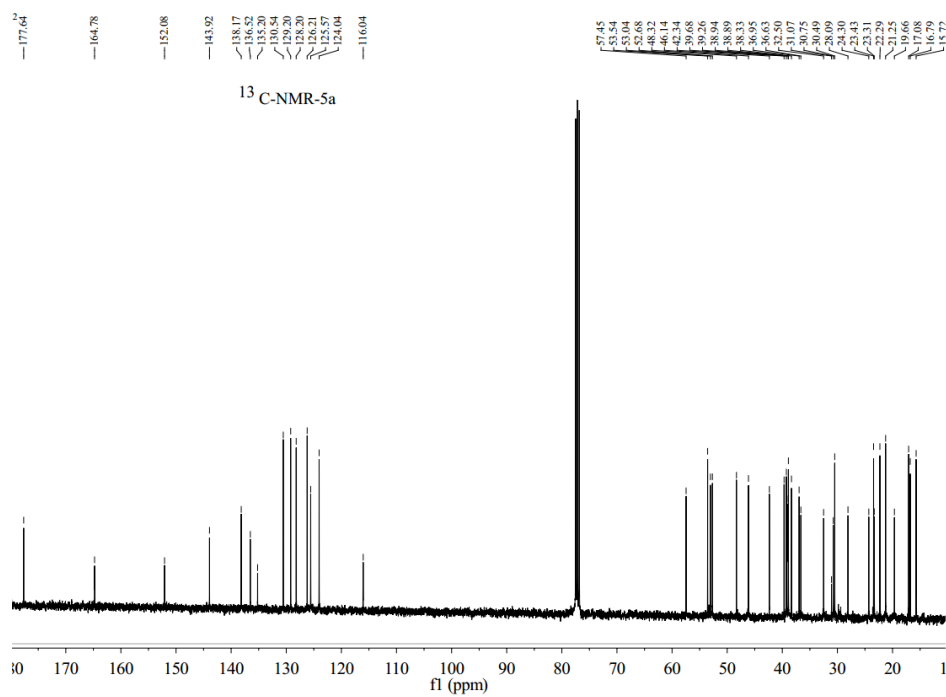

Figure 2.  $^{13}\text{C}$  NMR spectra of **5a**.

UA-1\_151215192816 #17 RT: 0.57 AV: 1 NL: 2.08E6  
T: FTMS + c ESI Full ms [710.00-720.00]

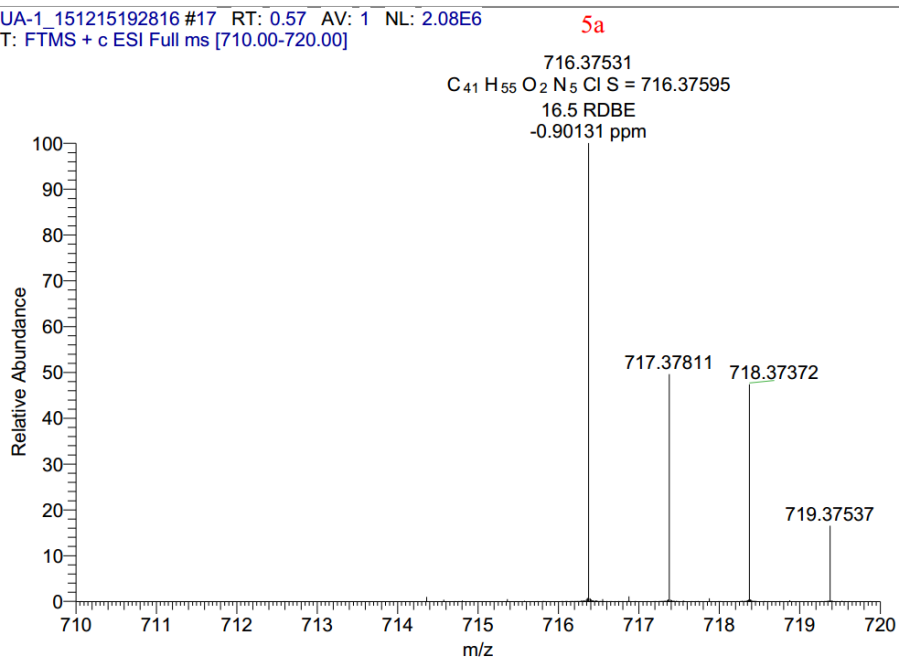

**Figure 3.** HR-MS spectra of **5a**.

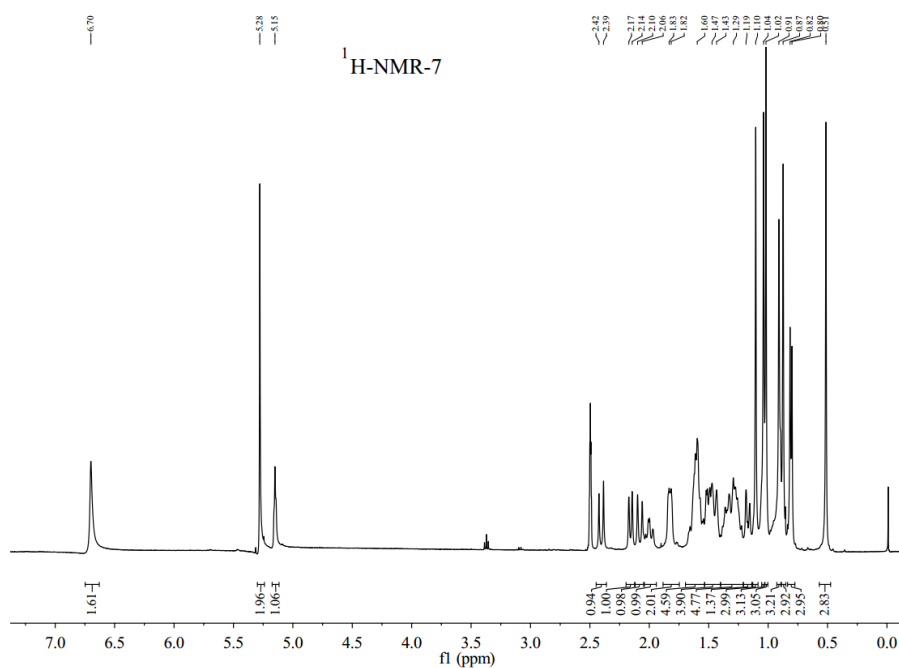

**Figure S4.** <sup>1</sup>H NMR spectra of **7**

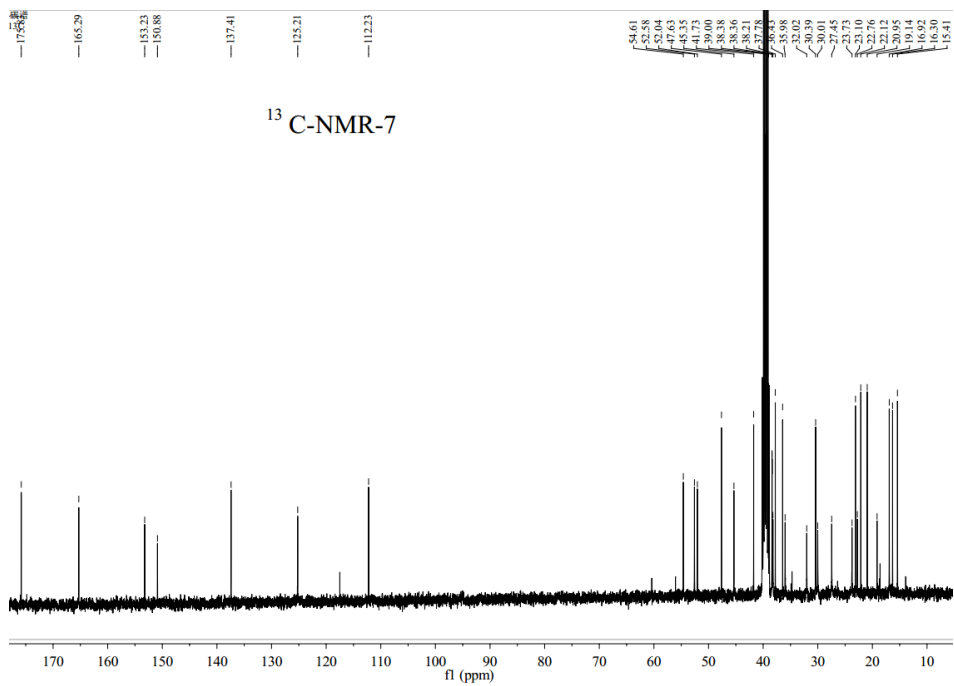

Figure 5. <sup>13</sup>C NMR spectra of **7**.

E:\2016\...\20170116\I-1

7

1/16/2017 10:19:31 PM

I-1 #39-42 RT: 0.41-0.44 AV: 4 NL: 1.29E8  
T: FTMS + p ESI Full ms [100.00-2000.00]

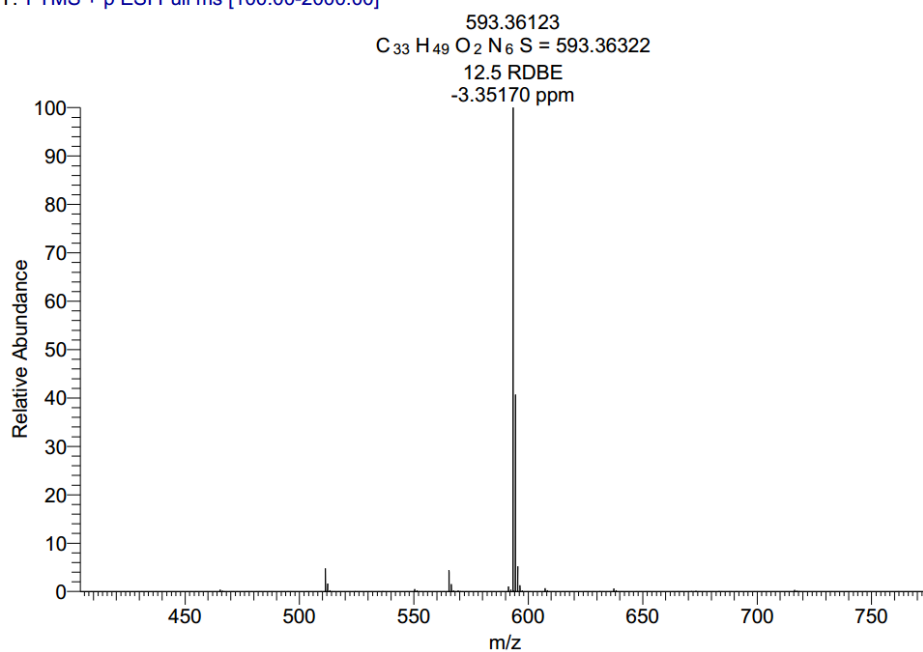

Figure S6. HRMS spectra of **7**

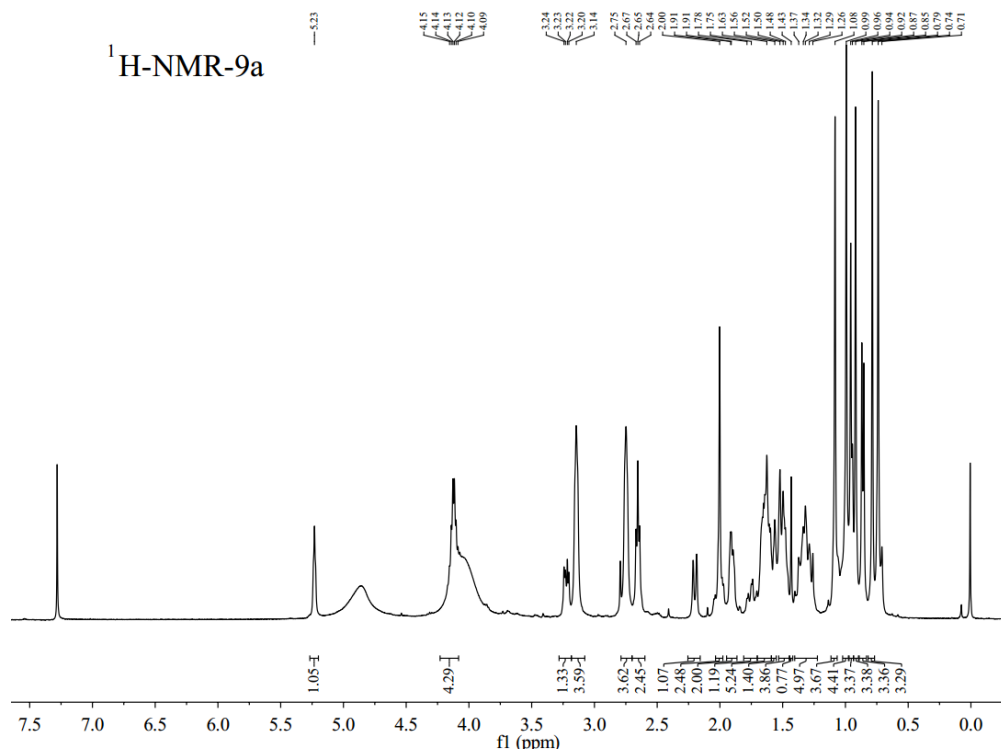

Figure 7. <sup>1</sup>H NMR spectra of 9a.

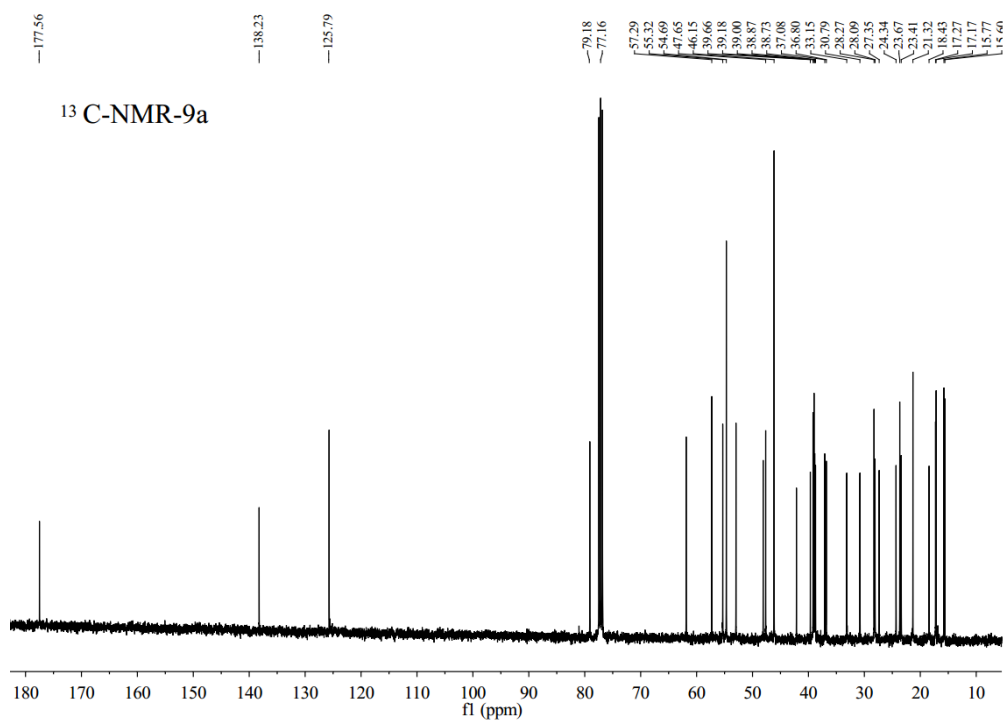

Figure 8. <sup>13</sup>C NMR spectra of 9a.

**9a**3-5 #76-83 RT: 0.83-0.89 AV: 8 SB: 17 0.77-0.83 , 1.15-1.23 NL: 4.22E7  
T: FTMS + c ESI Full ms [50.00-2000.00]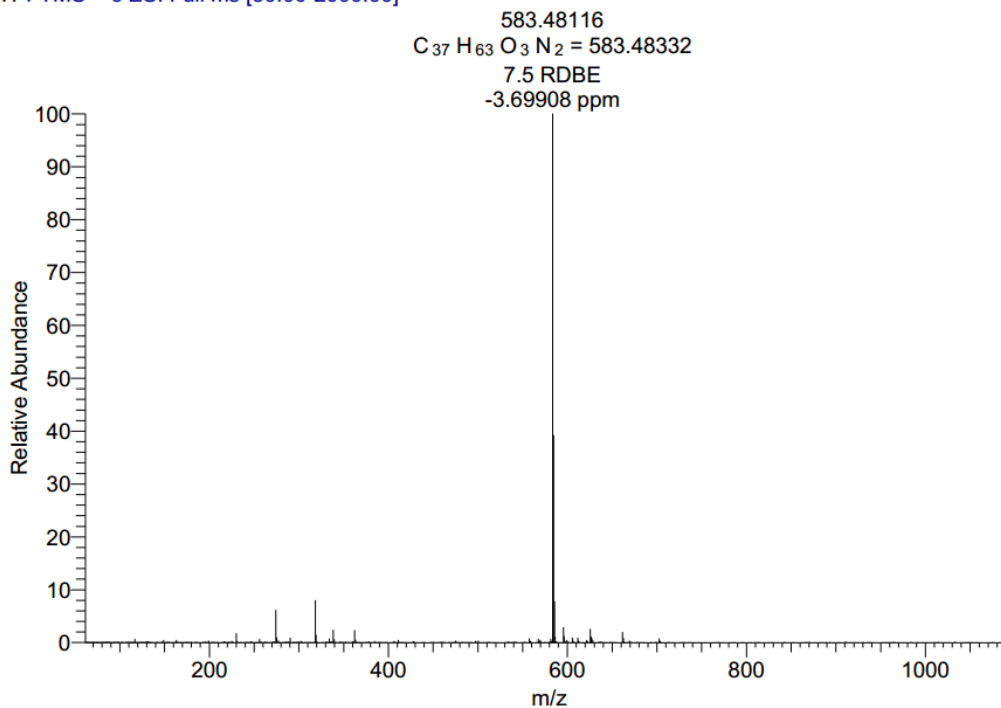Figure 9. HRMS spectra of **9a**.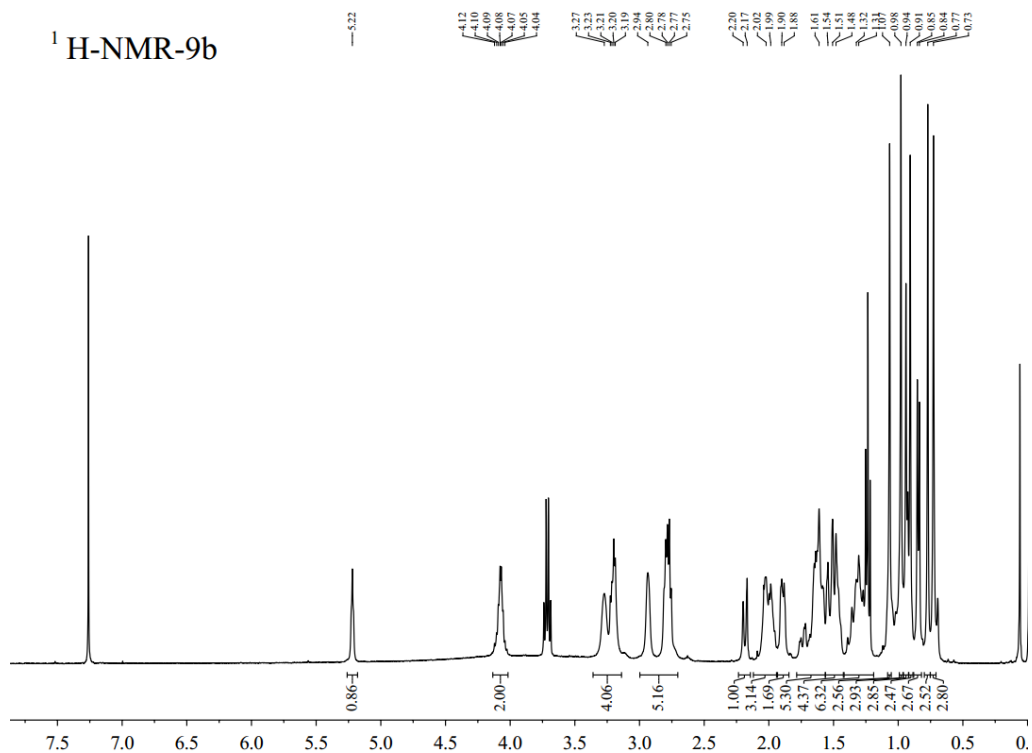Figure S10. <sup>1</sup>H NMR spectra of **9b**

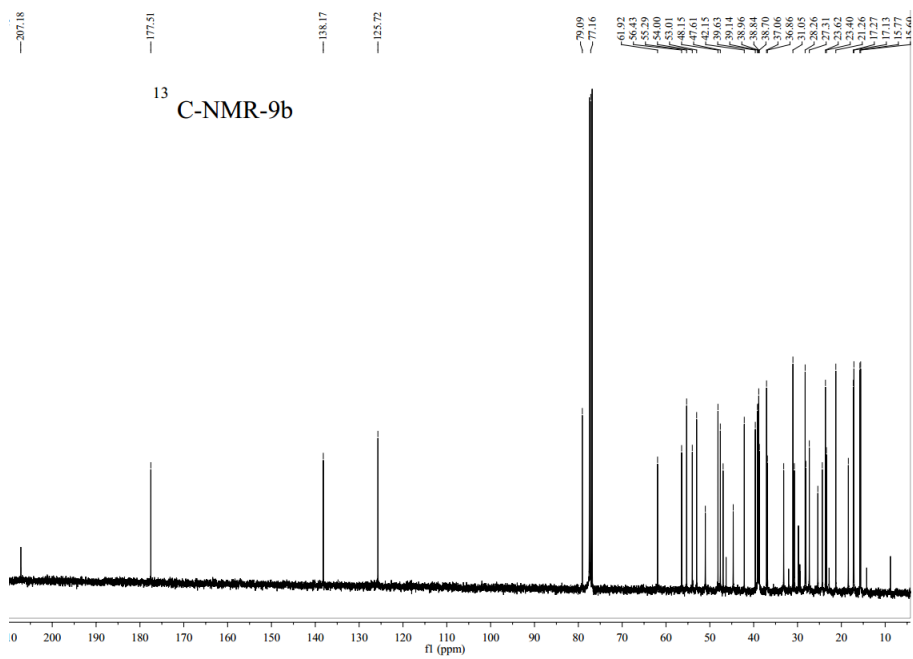

Figure S11. <sup>13</sup>C NMR spectra of **9b**

E:\2016\2016.7.12\MQG\w-4

7/12/2016 8:55:46 PM

u-4

**9b**

u-4 #40-46 RT: 0.35-0.40 AV: 7 SB: 9 0.32-0.35 , 0.37-0.41 NL: 2.72E6  
T: FTMS + c ESI Full ms [50.00-1500.00]

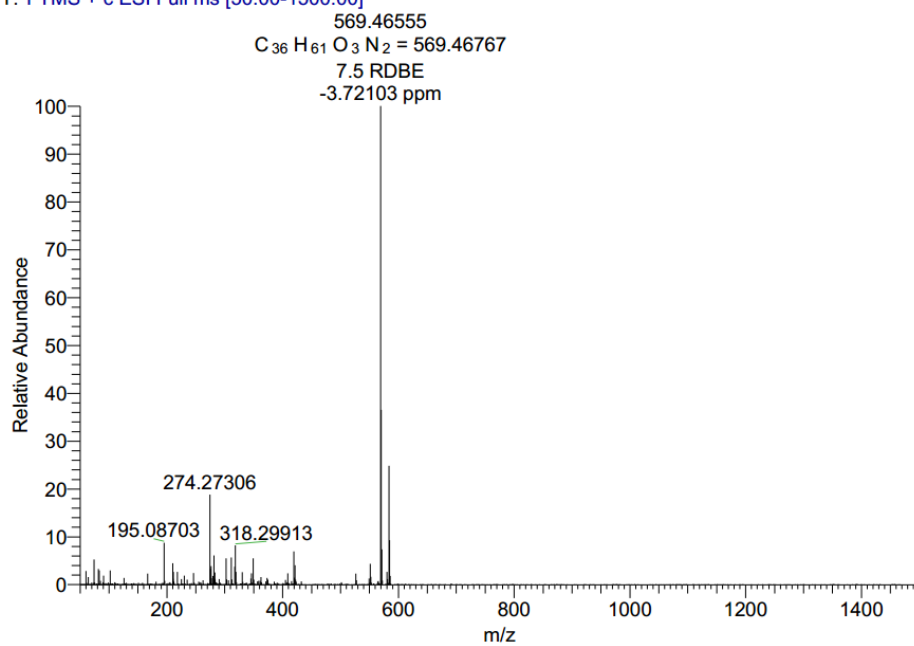

Figure S12. HRMS spectra of **9b**

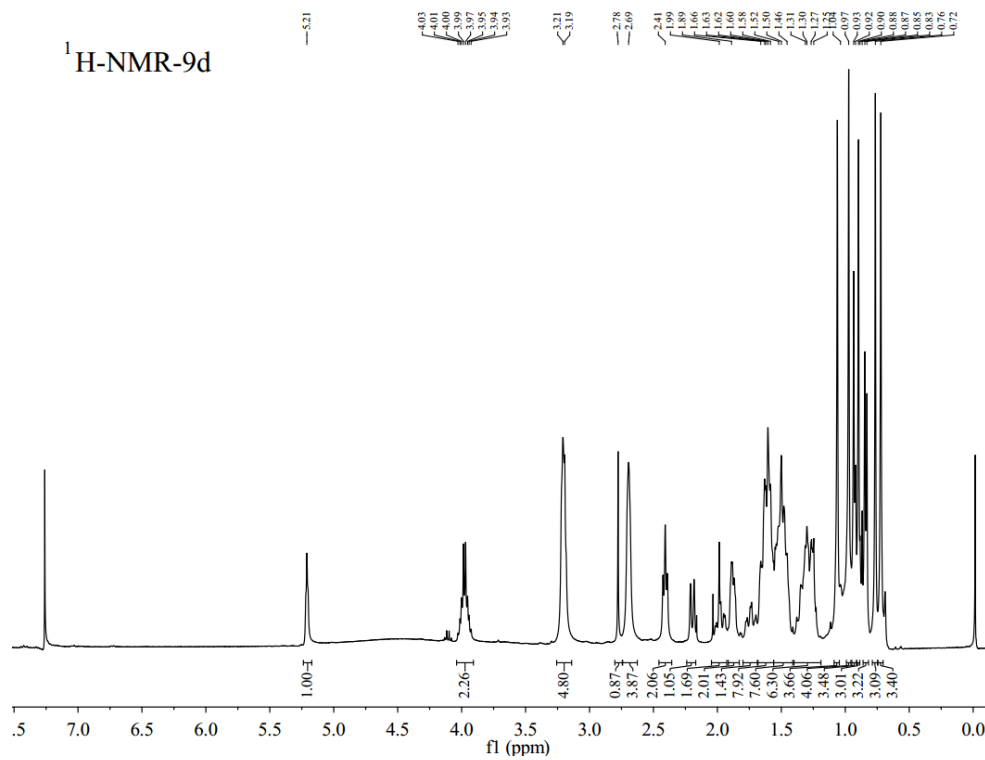

Figure S13. <sup>1</sup>H NMR spectra of **9d**

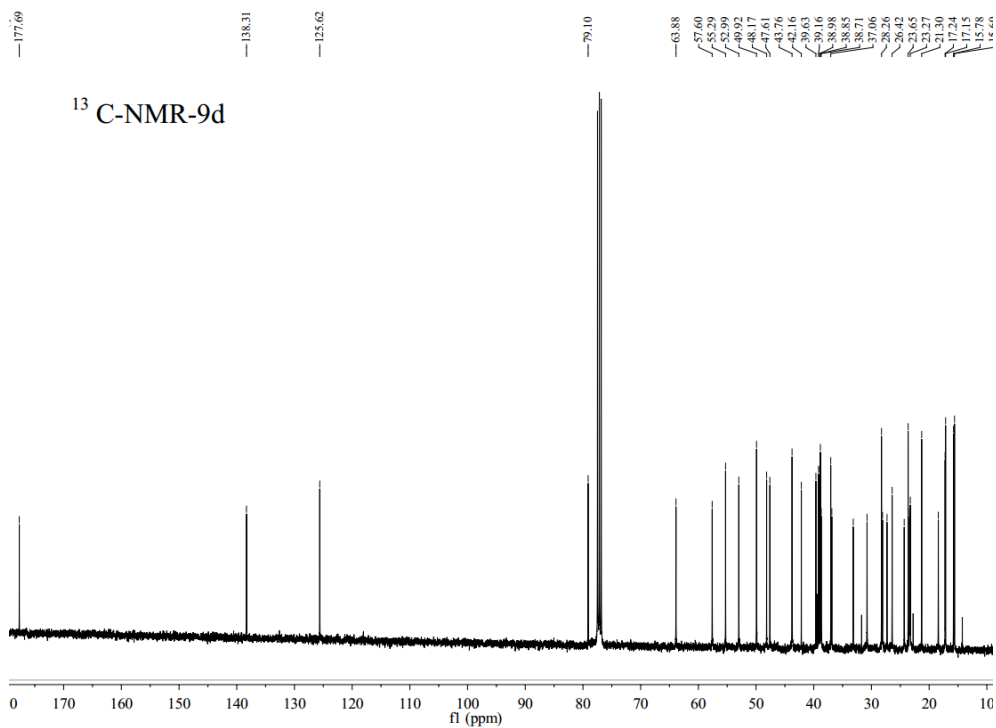

Figure S14. <sup>13</sup>C NMR spectra of **9d**

9d

3-9 #30-32 RT: 0.31-0.33 AV: 3 SB: 8 0.21-0.24, 0.53-0.55 NL: 8.22E7  
T: FTMS + c ESI Full ms [50.00-2000.00]

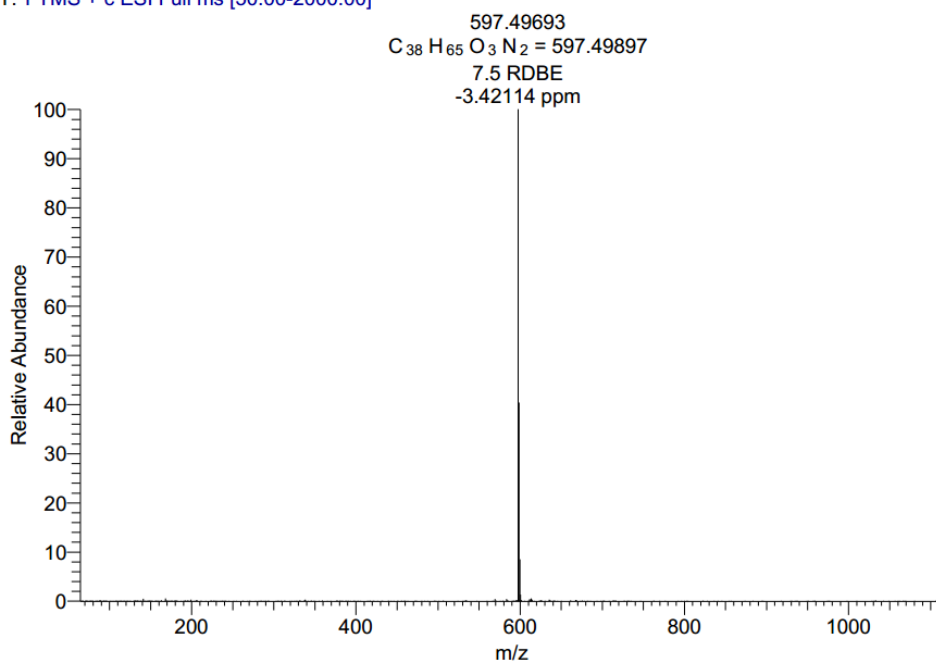

Figure S15. HRMS spectra of 9d

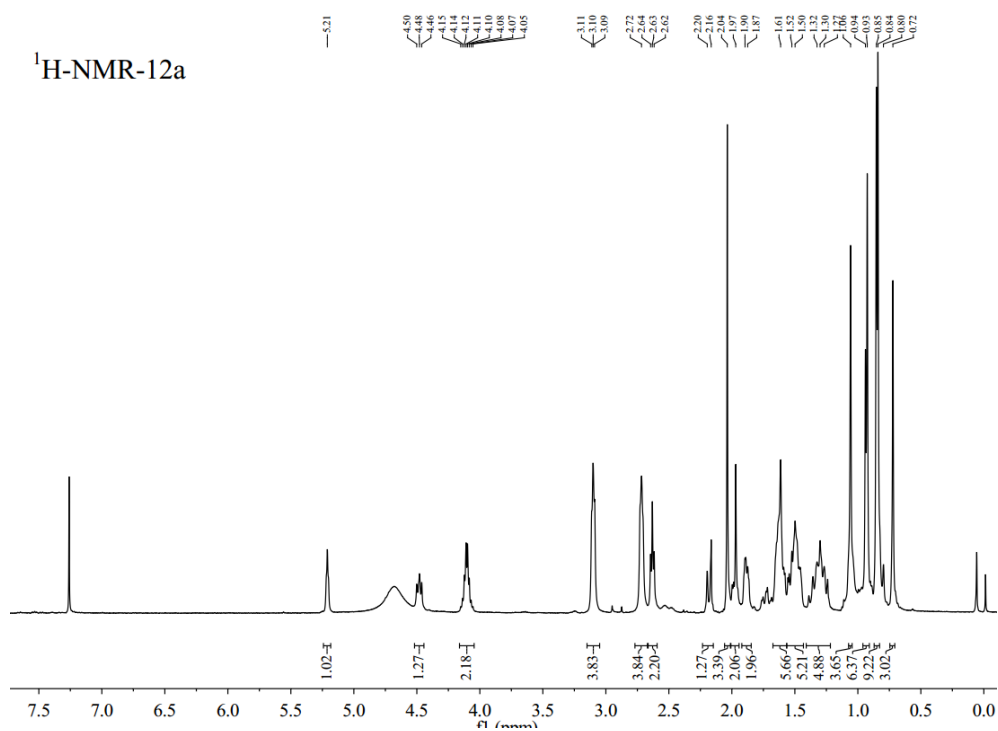Figure S16.  $^1H$  NMR spectra of 12a



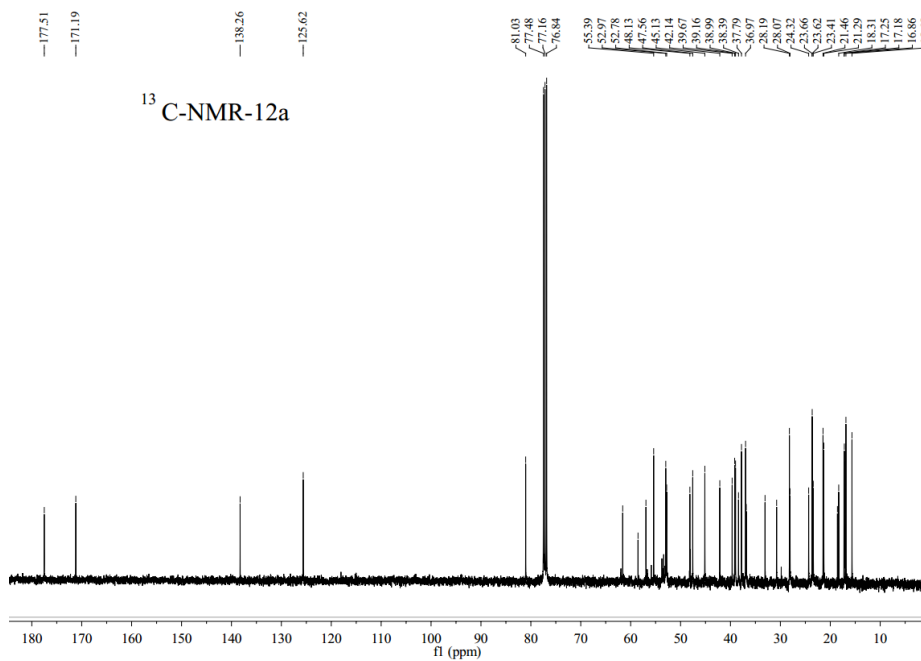

Figure S17. <sup>13</sup>C NMR spectra of 12a

E:\2016\HRMS\20161102\MENG\3\3-10

11/3/2016 2:50:15 PM

12a

3-10 #2-10 RT: 0.02-0.28 AV: 9 NL: 1.14E7  
T: FTMS + p ESI Full ms [100.00-1000.00]

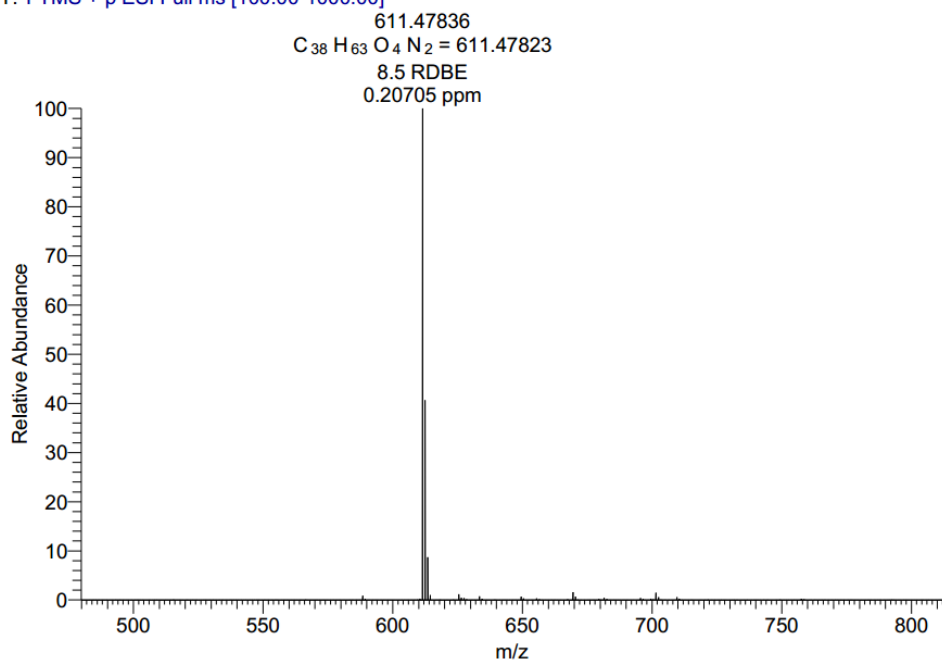

Figure S18. HRMS spectra of 12a

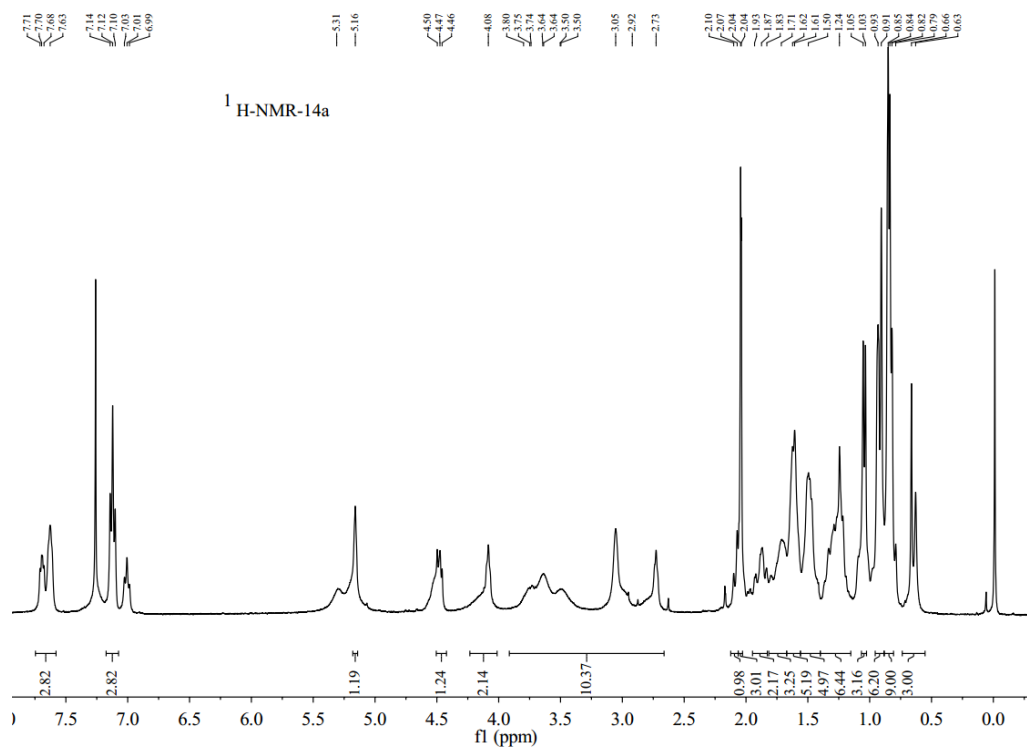

Figure S19. <sup>1</sup>H NMR spectra of 14a

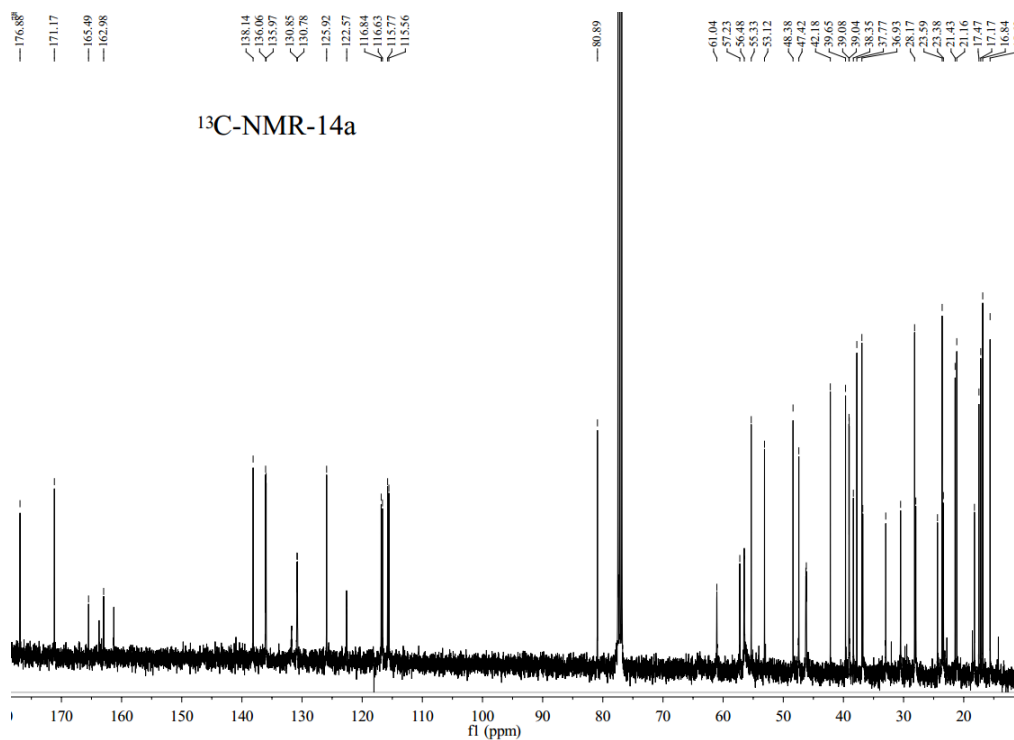

Figure S20. <sup>13</sup>C NMR spectra of 14a

14a

3-12 #2-11 RT: 0.02-0.31 AV: 10 NL: 1.30E4  
T: FTMS + p ESI Full ms [100.00-1000.00]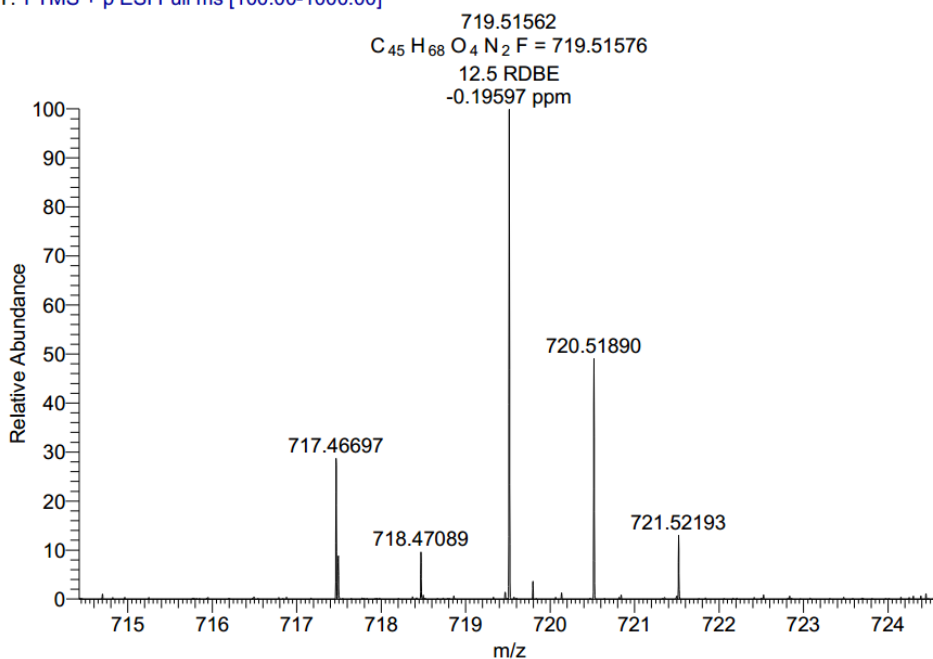

Figure S21. HRMS spectra of 14a

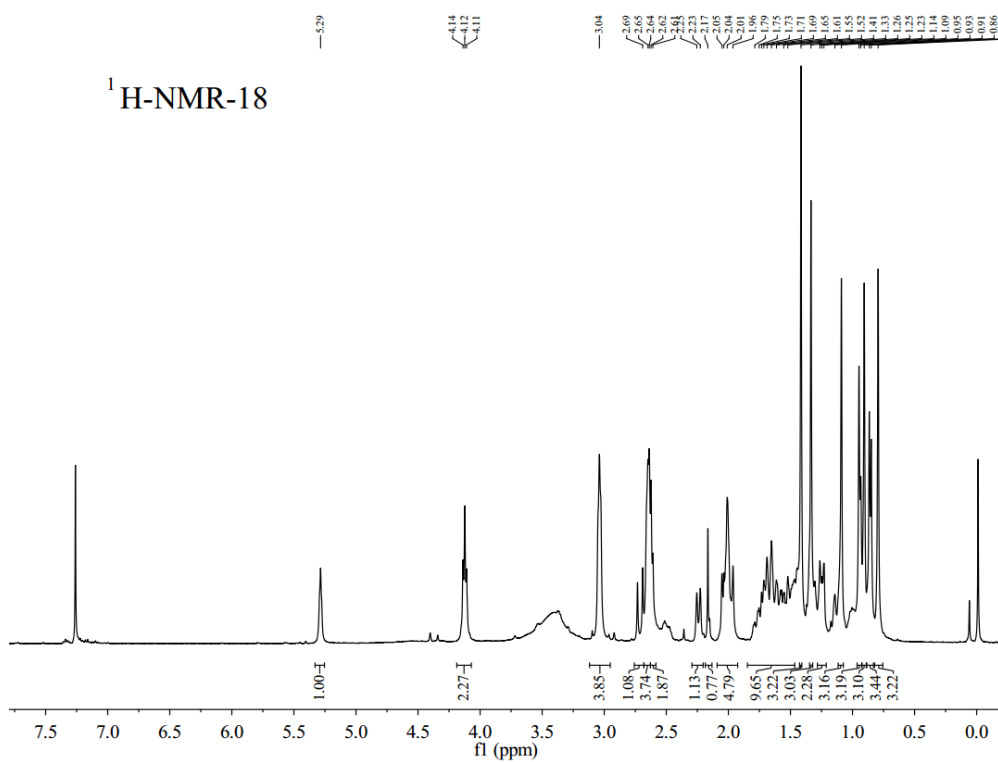Figure S22.  $^1H$  NMR spectra of 18

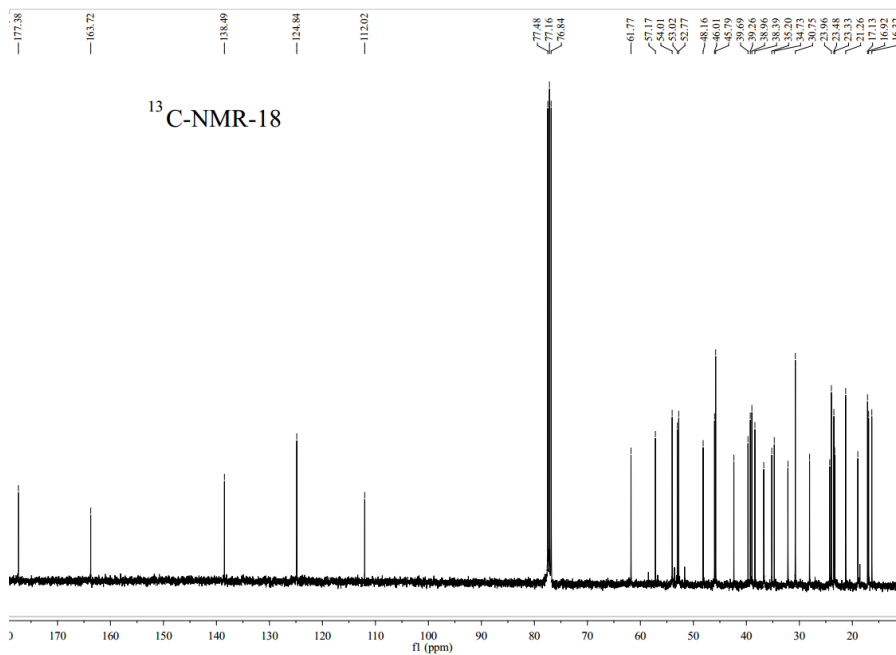

Figure S23. <sup>13</sup>C NMR spectra of **18**

E:\2016\...\20160918\3\3-10

**18**

9/18/2016 7:09:28 PM

3-10

3-10 #32-36 RT: 0.34-0.38 AV: 5 SB: 10 0.29-0.32, 0.56-0.60 NL: 1.98E7  
T: FTMS + c ESI Full ms [50.00-2000.00]

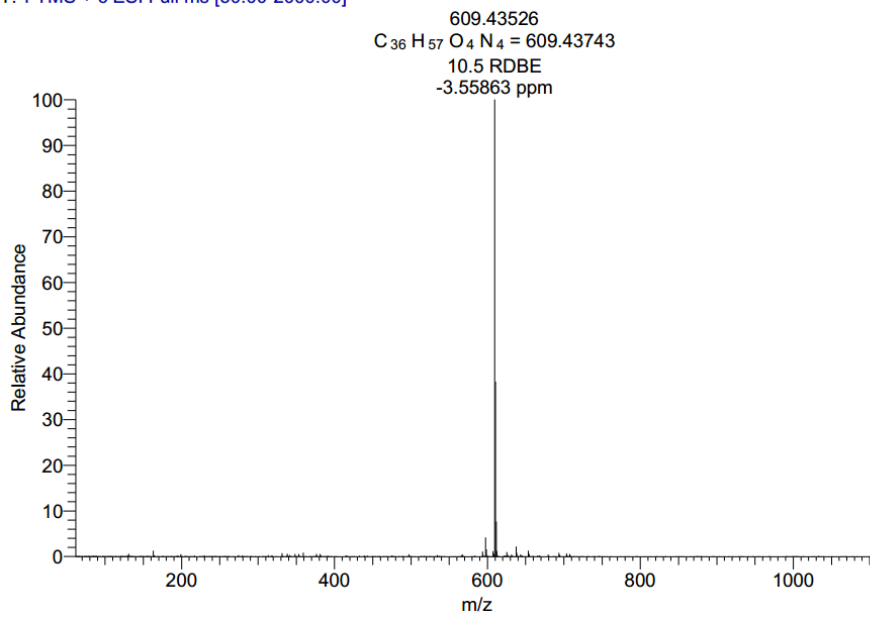

Figure S24. HRMS spectra of **18**
